# Supplementary material
Source: PubMed Central journal article supplement (PMC9646765)
Supplement: 41598_2022_23342_MOESM3_ESM.pdf [file 41598_2022_23342_MOESM3_ESM.pdf]

## Supplementary Tables S1-S7

Table S1. Descriptive table of SNV numbers by continent/country/region/sub-region around the world: number of reported viruses, minimum number, 1st quartile, median, mean, 3rd quartile and maximum number of mutations on each viral genome

Table S2. Cross-tabulation of six Omicron clusters with six continents in the world

Table S3. Spacial distributions of four emerging polymutants (R346, A701, I1081, N1192) in the spike protein across all countries around world

Table S4. Spacial distributions of six emerging polymutants (V1887, V2867, Y4852, L5086) in ORF1ab, L106 in ORF3a and D343 in N across all countries around world

Table S5. Haplotype frequencies of joined core haplotypes of polymutants in the spike and non-spike genes.

Table S6. Space-time investigation of newly emerging mutation haplotype "RAINVVFGF" for the first reported case. Note that Canada / Ontario reported three cases in November and one case in December, 2021 without providing actual dates.

Table S7. Space-time investigation of newly emerging mutation haplotype "RAVNVAFGY", that has five mutations and observed among 60 viruses in United Kingdom.

Table S1

|    | <b>Continent/Country/Region/Sub-region</b>           | <b>Freq</b> | <b>Min</b> | <b>1st</b> | <b>Med</b> | <b>3rd</b> | <b>Max</b> |
|----|------------------------------------------------------|-------------|------------|------------|------------|------------|------------|
| 1  | Africa/Botswana/Gaborone                             | 17          | 14         | 26         | 26         | 30         | 30         |
| 2  | Africa/Botswana/Lobatse                              | 1           | 31         | 31         | 31         | 31         | 31         |
| 3  | Africa/Botswana/Otse                                 | 1           | 26         | 26         | 26         | 26         | 26         |
| 4  | Africa/Botswana/Palapye                              | 3           | 30         | 30         | 30         | 30         | 30         |
| 5  | Africa/Botswana/South East/Greater Gaborone/Gaborone | 52          | 12         | 28         | 30         | 31         | 38         |
| 6  | Africa/Botswana/South East/Greater Gaborone/Lobatse  | 2           | 28         | 28         | 29         | 29         | 29         |
| 7  | Africa/Botswana/South East/Greater Gaborone/Mochudi  | 1           | 29         | 29         | 29         | 29         | 29         |
| 8  | Africa/Botswana/South East/Greater Gaborone/Oodi     | 1           | 21         | 21         | 21         | 21         | 21         |
| 9  | Africa/Botswana/South East/Greater Gaborone/Ramotswa | 1           | 16         | 16         | 16         | 16         | 16         |
| 10 | Africa/Ghana/Accra                                   | 33          | 29         | 29         | 30         | 31         | 32         |
| 11 | Africa/Malawi/Blantyre                               | 3           | 30         | 31         | 31         | 32         | 32         |
| 12 | Africa/Nigeria/Abuja                                 | 11          | 28         | 30         | 30         | 31         | 31         |
| 13 | Africa/Reunion                                       | 2           | 29         | 29         | 30         | 30         | 30         |
| 14 | Africa/Senegal/Dakar/Iressef Diamniadio              | 1           | 15         | 15         | 15         | 15         | 15         |
| 15 | Africa/Senegal/Dakar/IRESSEF DIAMNIADIO              | 6           | 29         | 29         | 31         | 33         | 34         |
| 16 | Africa/Sierra Leone                                  | 1           | 29         | 29         | 29         | 29         | 29         |
| 17 | Africa/South Africa                                  | 6           | 24         | 26         | 30         | 31         | 31         |
| 18 | Africa/South Africa/Eastern Cape                     | 23          | 28         | 30         | 30         | 31         | 35         |
| 19 | Africa/South Africa/Eastern Cape/Nelson Mandela Bay  | 8           | 28         | 29         | 30         | 30         | 33         |

|    |                                          |     |    |    |    |    |    |
|----|------------------------------------------|-----|----|----|----|----|----|
|    | Africa/South Africa/Eastern Cape/Sarah   |     |    |    |    |    |    |
| 20 | Baartman                                 | 6   | 30 | 30 | 31 | 31 | 31 |
| 21 | Africa/South Africa/Free State           | 11  | 25 | 29 | 29 | 30 | 32 |
| 22 | Africa/South Africa/Gauteng              | 257 | 18 | 29 | 29 | 30 | 34 |
|    | Africa/South Africa/Gauteng/City of      |     |    |    |    |    |    |
| 23 | Johannesburg Metro                       | 2   | 29 | 29 | 30 | 30 | 30 |
|    | Africa/South Africa/Gauteng/City of      |     |    |    |    |    |    |
| 24 | Johannesburg Metro Region A              | 2   | 29 | 29 | 29 | 29 | 29 |
|    | Africa/South Africa/Gauteng/City of      |     |    |    |    |    |    |
| 25 | Johannesburg Metro Region B              | 4   | 29 | 29 | 29 | 29 | 30 |
|    | Africa/South Africa/Gauteng/City of      |     |    |    |    |    |    |
| 26 | Johannesburg Metro Region C              | 6   | 29 | 29 | 30 | 30 | 30 |
|    | Africa/South Africa/Gauteng/City of      |     |    |    |    |    |    |
| 27 | Johannesburg Metro Region E              | 14  | 29 | 29 | 30 | 30 | 32 |
|    | Africa/South Africa/Gauteng/City of      |     |    |    |    |    |    |
| 28 | Johannesburg Metro Region F              | 21  | 29 | 29 | 29 | 30 | 31 |
| 29 | Africa/South Africa/Gauteng/Sedibeng     | 4   | 28 | 30 | 31 | 31 | 31 |
| 30 | Africa/South Africa/Gauteng/Tshwane      | 27  | 27 | 29 | 30 | 30 | 39 |
| 31 | Africa/South Africa/Kwazulu-Natal        | 1   | 23 | 23 | 23 | 23 | 23 |
| 32 | Africa/South Africa/KwaZulu-Natal        | 90  | 23 | 29 | 30 | 31 | 34 |
|    | Africa/South Africa/KwaZulu-             |     |    |    |    |    |    |
| 33 | Natal/eThekwini                          | 42  | 29 | 30 | 31 | 32 | 33 |
|    | Africa/South Africa/KwaZulu-Natal/Ilembe |     |    |    |    |    |    |
| 34 | Africa/South Africa/KwaZulu-Natal/Ilembe | 6   | 29 | 29 | 30 | 31 | 31 |
|    | Africa/South Africa/KwaZulu-Natal/King   |     |    |    |    |    |    |
| 35 | Cetshwayo                                | 40  | 22 | 29 | 30 | 32 | 35 |
| 36 | Africa/South Africa/KwaZulu-Natal/Ugu    | 10  | 30 | 30 | 31 | 31 | 33 |
|    | Africa/South Africa/KwaZulu-             |     |    |    |    |    |    |
| 37 | Natal/uMkhanyakude                       | 3   | 29 | 30 | 30 | 30 | 30 |
|    | Africa/South Africa/KwaZulu-             |     |    |    |    |    |    |
| 38 | Natal/Zululand                           | 13  | 28 | 31 | 31 | 32 | 34 |

|    |                                           |     |    |    |    |    |    |
|----|-------------------------------------------|-----|----|----|----|----|----|
| 39 | Africa/South Africa/Limpopo               | 6   | 29 | 29 | 30 | 31 | 31 |
| 40 | Africa/South Africa/Mpumalanga            | 35  | 22 | 28 | 28 | 31 | 32 |
| 41 | Africa/South Africa/North West            | 30  | 26 | 29 | 30 | 31 | 32 |
| 42 | Africa/South Africa/Northern Cape         | 37  | 20 | 28 | 29 | 29 | 32 |
| 43 | Africa/South Africa/Western Cape          | 39  | 27 | 29 | 30 | 30 | 32 |
|    | Africa/South Africa/Western Cape          |     |    |    |    |    |    |
| 44 | Province/Cape Town Metro                  | 157 | 23 | 29 | 29 | 30 | 33 |
| 45 | Asia/Bangladesh/Dhaka/Dhaka               | 2   | 29 | 29 | 30 | 30 | 30 |
| 46 | Asia/Hong Kong                            | 18  | 29 | 29 | 30 | 31 | 31 |
| 47 | Asia/India/Delhi                          | 2   | 29 | 30 | 30 | 31 | 31 |
| 48 | Asia/India/Gujarat/Jamnagar               | 1   | 46 | 46 | 46 | 46 | 46 |
| 49 | Asia/India/Karnataka                      | 2   | 30 | 30 | 30 | 30 | 30 |
| 50 | Asia/India/Maharashtra/Pune               | 1   | 32 | 32 | 32 | 32 | 32 |
| 51 | Asia/India/New Delhi                      | 1   | 30 | 30 | 30 | 30 | 30 |
| 52 | Asia/Israel                               | 67  | 19 | 29 | 30 | 31 | 32 |
| 53 | Asia/Japan                                | 7   | 30 | 30 | 32 | 32 | 33 |
| 54 | Asia/Jordan/Amman                         | 2   | 29 | 29 | 30 | 30 | 30 |
| 55 | Asia/Malaysia/Selangor                    | 1   | 20 | 20 | 20 | 20 | 20 |
| 56 | Asia/Maldives/Sandies Bathala resort      | 1   | 22 | 22 | 22 | 22 | 22 |
| 57 | Asia/Nepal/Bagmati                        | 2   | 29 | 29 | 29 | 29 | 29 |
| 58 | Asia/Pakistan                             | 1   | 29 | 29 | 29 | 29 | 29 |
| 59 | Asia/Singapore                            | 13  | 29 | 30 | 31 | 31 | 35 |
| 60 | Asia/South Korea                          | 9   | 29 | 30 | 30 | 30 | 30 |
| 61 | Asia/Sri Lanka/Marawila                   | 2   | 21 | 24 | 27 | 29 | 32 |
| 62 | Asia/Thailand/Bangkok/Bangrak             | 1   | 26 | 26 | 26 | 26 | 26 |
| 63 | Asia/Thailand/Bangkok/Nongkhaem           | 2   | 32 | 32 | 33 | 33 | 33 |
| 64 | Europe/Austria/Burgenland                 | 2   | 26 | 27 | 28 | 29 | 30 |
| 65 | Europe/Austria/Lower Austria              | 5   | 29 | 29 | 32 | 33 | 33 |
|    | Europe/Austria/Lower Austria/Bruck an der |     |    |    |    |    |    |
| 66 | Leitha/Schwechat                          | 2   | 30 | 30 | 30 | 30 | 30 |
| 67 | Europe/Austria/Tyrol/Schwaz               | 1   | 29 | 29 | 29 | 29 | 29 |

|    |                                                                         |    |    |    |    |    |    |
|----|-------------------------------------------------------------------------|----|----|----|----|----|----|
| 68 | Europe/Austria/Tyrol/Schwaz/Vomp                                        | 3  | 29 | 29 | 29 | 29 | 29 |
|    | Europe/Austria/Upper<br>Austria/VÄ¶cklabruck/St. Georgen im<br>Attergau | 1  | 31 | 31 | 31 | 31 | 31 |
| 70 | Europe/Austria/Vienna                                                   | 3  | 30 | 30 | 30 | 31 | 31 |
| 71 | Europe/Belgium                                                          | 2  | 30 | 30 | 30 | 30 | 30 |
| 72 | Europe/Belgium/Antwerpen                                                | 1  | 32 | 32 | 32 | 32 | 32 |
| 73 | Europe/Belgium/Beersel                                                  | 1  | 30 | 30 | 30 | 30 | 30 |
| 74 | Europe/Belgium/Brabant Wallon                                           | 1  | 30 | 30 | 30 | 30 | 30 |
| 75 | Europe/Belgium/Brussels                                                 | 2  | 32 | 32 | 32 | 32 | 32 |
| 76 | Europe/Belgium/Brussels Capital Region                                  | 11 | 30 | 30 | 31 | 32 | 34 |
| 77 | Europe/Belgium/Flemish Brabant                                          | 5  | 27 | 28 | 30 | 30 | 32 |
| 78 | Europe/Belgium/Geel                                                     | 1  | 30 | 30 | 30 | 30 | 30 |
| 79 | Europe/Belgium/Ghent                                                    | 3  | 29 | 30 | 30 | 31 | 32 |
| 80 | Europe/Belgium/Hainaut                                                  | 29 | 26 | 30 | 30 | 31 | 33 |
| 81 | Europe/Belgium/Jette                                                    | 1  | 34 | 34 | 34 | 34 | 34 |
| 82 | Europe/Belgium/Liege                                                    | 1  | 31 | 31 | 31 | 31 | 31 |
| 83 | Europe/Belgium/Limburg                                                  | 1  | 32 | 32 | 32 | 32 | 32 |
| 84 | Europe/Belgium/Meerhout                                                 | 2  | 30 | 30 | 31 | 31 | 31 |
| 85 | Europe/Belgium/Namur                                                    | 1  | 34 | 34 | 34 | 34 | 34 |
| 86 | Europe/Belgium/Putte                                                    | 5  | 21 | 30 | 30 | 30 | 32 |
| 87 | Europe/Belgium/Sint-agatha-berchem                                      | 1  | 25 | 25 | 25 | 25 | 25 |
| 88 | Europe/Belgium/Sint-Agatha-Berchem                                      | 1  | 34 | 34 | 34 | 34 | 34 |
| 89 | Europe/Belgium/Sint-Pieters-Leeuw                                       | 3  | 29 | 29 | 29 | 30 | 30 |
| 90 | Europe/Belgium/Vlamertinge                                              | 1  | 28 | 28 | 28 | 28 | 28 |
| 91 | Europe/Belgium/Wallonie/Hainaut/Enghien                                 | 1  | 32 | 32 | 32 | 32 | 32 |
| 92 | Europe/Belgium/Wilrijk                                                  | 1  | 30 | 30 | 30 | 30 | 30 |
| 93 | Europe/Croatia/The City of Zagreb                                       | 1  | 32 | 32 | 32 | 32 | 32 |
| 94 | Europe/Croatia/Zagreb County                                            | 1  | 32 | 32 | 32 | 32 | 32 |

|     |                                                               |    |    |    |    |    |    |
|-----|---------------------------------------------------------------|----|----|----|----|----|----|
| 95  | Europe/Czech Republic/Liberec<br>Region/Rynoltice             | 1  | 29 | 29 | 29 | 29 | 29 |
| 96  | Europe/Czech Republic/South Moravian<br>Region/Adamov         | 2  | 29 | 30 | 30 | 31 | 31 |
| 97  | Europe/Czech Republic/South Moravian<br>Region/Brno           | 1  | 27 | 27 | 27 | 27 | 27 |
| 98  | Europe/Czech Republic/South Moravian<br>Region/Slavkov u Brna | 1  | 29 | 29 | 29 | 29 | 29 |
| 99  | Europe/Denmark                                                | 1  | 30 | 30 | 30 | 30 | 30 |
| 100 | Europe/Denmark/Hovedstaden                                    | 46 | 29 | 30 | 31 | 31 | 32 |
| 101 | Europe/Denmark/Midtjylland                                    | 66 | 29 | 32 | 32 | 32 | 34 |
| 102 | Europe/Denmark/Nordjylland                                    | 17 | 30 | 32 | 32 | 33 | 34 |
| 103 | Europe/Denmark/Sjaelland                                      | 4  | 29 | 30 | 31 | 31 | 32 |
| 104 | Europe/Denmark/Syddanmark                                     | 12 | 23 | 30 | 30 | 30 | 33 |
| 105 | Europe/Finland                                                | 3  | 30 | 30 | 30 | 31 | 31 |
| 106 | Europe/France/Auvergne-Rhone-<br>Alpes/Clermont Ferrand       | 1  | 26 | 26 | 26 | 26 | 26 |
| 107 | Europe/France/Auvergne-Rhone-<br>Alpes/Haute-Savoie           | 2  | 29 | 29 | 29 | 29 | 29 |
| 108 | Europe/France/Auvergne-Rhone-<br>Alpes/Thonon les bains       | 1  | 30 | 30 | 30 | 30 | 30 |
| 109 | Europe/France/Bretagne/Rennes                                 | 2  | 28 | 28 | 29 | 29 | 29 |
| 110 | Europe/France/Centre-Val de Loire/Eure-<br>et-Loir            | 1  | 30 | 30 | 30 | 30 | 30 |
| 111 | Europe/France/Centre-Val de Loire/Luisant                     | 1  | 29 | 29 | 29 | 29 | 29 |
| 112 | Europe/France/Ile-de-France                                   | 6  | 30 | 31 | 31 | 31 | 32 |
| 113 | Europe/France/Nouvelle-Aquitaine                              | 1  | 27 | 27 | 27 | 27 | 27 |
| 114 | Europe/France/Nouvelle-<br>Aquitaine/Bordeaux                 | 1  | 30 | 30 | 30 | 30 | 30 |

|     |                                                                           |    |    |    |    |    |    |
|-----|---------------------------------------------------------------------------|----|----|----|----|----|----|
| 115 | Europe/France/Pays de loire/La roche sur<br>yon                           | 1  | 29 | 29 | 29 | 29 | 29 |
| 116 | Europe/France/Provence-Alpes-Cote d Azur                                  | 15 | 27 | 30 | 30 | 31 | 31 |
| 117 | Europe/France/Provence-Alpes-Cote<br>d'Azur                               | 3  | 29 | 30 | 30 | 30 | 30 |
| 118 | Europe/France/Provence-Alpes-Cote<br>d'Azur/Alpes-Maritimes               | 1  | 31 | 31 | 31 | 31 | 31 |
| 119 | Europe/Germany/Baden-Wurttemberg                                          | 6  | 30 | 31 | 32 | 32 | 35 |
| 120 | Europe/Germany/Bavaria                                                    | 18 | 29 | 29 | 30 | 32 | 33 |
| 121 | Europe/Germany/Bavaria/Munich                                             | 23 | 24 | 30 | 30 | 30 | 33 |
| 122 | Europe/Germany/Berlin                                                     | 1  | 29 | 29 | 29 | 29 | 29 |
| 123 | Europe/Germany/Berlin/Berlin                                              | 1  | 31 | 31 | 31 | 31 | 31 |
| 124 | Europe/Germany/Brandenburg                                                | 3  | 29 | 29 | 29 | 30 | 31 |
| 125 | Europe/Germany/Hamburg                                                    | 7  | 28 | 29 | 30 | 31 | 32 |
| 126 | Europe/Germany/Hesse                                                      | 24 | 29 | 29 | 30 | 31 | 32 |
| 127 | Europe/Germany/Lower Saxony                                               | 4  | 28 | 29 | 30 | 30 | 30 |
| 128 | Europe/Germany/North Rhine-Westphalia                                     | 6  | 29 | 29 | 30 | 31 | 33 |
| 129 | Europe/Germany/North Rhine-<br>Westphalia/Düsseldorf Health<br>department | 3  | 27 | 27 | 27 | 27 | 27 |
| 130 | Europe/Germany/Saxony                                                     | 1  | 27 | 27 | 27 | 27 | 27 |
| 131 | Europe/Germany/Schleswig-Holstein                                         | 3  | 30 | 30 | 30 | 31 | 31 |
| 132 | Europe/Germany/Thuringia                                                  | 1  | 32 | 32 | 32 | 32 | 32 |
| 133 | Europe/Gibraltar                                                          | 6  | 31 | 33 | 33 | 35 | 38 |
| 134 | Europe/Greece                                                             | 1  | 28 | 28 | 28 | 28 | 28 |
| 135 | Europe/Ireland/Dublin                                                     | 1  | 30 | 30 | 30 | 30 | 30 |
| 136 | Europe/Ireland/Longford                                                   | 1  | 30 | 30 | 30 | 30 | 30 |
| 137 | Europe/Ireland/Meath                                                      | 4  | 25 | 29 | 30 | 30 | 31 |
| 138 | Europe/Italy/Calabria                                                     | 1  | 30 | 30 | 30 | 30 | 30 |
| 139 | Europe/Italy/Campania                                                     | 3  | 29 | 32 | 35 | 46 | 56 |

|     |                                                    |    |    |    |    |    |    |
|-----|----------------------------------------------------|----|----|----|----|----|----|
| 140 | Europe/Italy/Lombardia                             | 2  | 27 | 28 | 29 | 30 | 31 |
| 141 | Europe/Italy/Piemonte                              | 2  | 36 | 37 | 38 | 38 | 39 |
| 142 | Europe/Italy/Puglia                                | 2  | 28 | 28 | 28 | 28 | 28 |
| 143 | Europe/Italy/Trentino-Alto Adige                   | 1  | 29 | 29 | 29 | 29 | 29 |
| 144 | Europe/Liechtenstein                               | 1  | 26 | 26 | 26 | 26 | 26 |
| 145 | Europe/Netherlands/Gelderland                      | 1  | 32 | 32 | 32 | 32 | 32 |
| 146 | Europe/Netherlands/Noord-Holland                   | 39 | 28 | 29 | 30 | 31 | 33 |
| 147 | Europe/Netherlands/Noord-Holland/Amsterdam         | 21 | 29 | 29 | 31 | 32 | 34 |
| 148 | Europe/Netherlands/Utrecht                         | 1  | 29 | 29 | 29 | 29 | 29 |
| 149 | Europe/Netherlands/Zeeland/Tholen                  | 1  | 29 | 29 | 29 | 29 | 29 |
| 150 | Europe/Norway/Oslo                                 | 19 | 29 | 29 | 29 | 29 | 30 |
| 151 | Europe/Norway/Vestland                             | 1  | 29 | 29 | 29 | 29 | 29 |
| 152 | Europe/Norway/Viken                                | 12 | 29 | 29 | 29 | 30 | 31 |
| 153 | Europe/Portugal                                    | 23 | 21 | 29 | 31 | 31 | 32 |
| 154 | Europe/Romania/Bucuresti                           | 2  | 30 | 30 | 31 | 31 | 31 |
| 155 | Europe/Russia/Moscow                               | 2  | 29 | 29 | 29 | 29 | 29 |
| 156 | Europe/Slovakia/Nitra                              | 2  | 30 | 30 | 30 | 30 | 30 |
| 157 | Europe/Slovakia/Presov                             | 1  | 30 | 30 | 30 | 30 | 30 |
| 158 | Europe/Spain/Albacete                              | 3  | 30 | 31 | 31 | 31 | 31 |
| 159 | Europe/Spain/Balearic Island                       | 6  | 19 | 30 | 31 | 31 | 33 |
| 160 | Europe/Spain/Basque Country/Donostia-San Sebastian | 1  | 29 | 29 | 29 | 29 | 29 |
| 161 | Europe/Spain/Castilla-La Mancha/Ciudad Real        | 5  | 28 | 31 | 31 | 32 | 32 |
| 162 | Europe/Spain/Catalunya                             | 10 | 30 | 31 | 31 | 32 | 34 |
| 163 | Europe/Spain/Catalunya/Barcelona                   | 1  | 30 | 30 | 30 | 30 | 30 |
| 164 | Europe/Spain/Catalunya/Girona                      | 1  | 32 | 32 | 32 | 32 | 32 |
| 165 | Europe/Spain/Galicia/Vigo                          | 2  | 32 | 32 | 33 | 33 | 33 |
| 166 | Europe/Spain/Madrid                                | 22 | 30 | 32 | 33 | 35 | 41 |
| 167 | Europe/Sweden/Jonkopings lan                       | 1  | 30 | 30 | 30 | 30 | 30 |



|     |                                           |      |    |    |    |    |    |
|-----|-------------------------------------------|------|----|----|----|----|----|
| 168 | Europe/Sweden/Skane                       | 1    | 31 | 31 | 31 | 31 | 31 |
| 169 | Europe/Sweden/Stockholm                   | 14   | 21 | 28 | 30 | 32 | 33 |
| 170 | Europe/Switzerland/Aargau                 | 2    | 30 | 30 | 31 | 31 | 31 |
| 171 | Europe/Switzerland/Basel-Landschaft       | 6    | 30 | 30 | 31 | 31 | 31 |
| 172 | Europe/Switzerland/Basel-Stadt            | 2    | 31 | 31 | 31 | 31 | 31 |
| 173 | Europe/Switzerland/Bern                   | 5    | 28 | 28 | 29 | 30 | 30 |
| 174 | Europe/Switzerland/BL                     | 3    | 31 | 31 | 31 | 31 | 31 |
| 175 | Europe/Switzerland/BS                     | 8    | 31 | 31 | 31 | 31 | 31 |
| 176 | Europe/Switzerland/Geneva                 | 1    | 29 | 29 | 29 | 29 | 29 |
| 177 | Europe/Switzerland/Solothurn              | 1    | 31 | 31 | 31 | 31 | 31 |
| 178 | Europe/Switzerland/Thurgau                | 1    | 24 | 24 | 24 | 24 | 24 |
| 179 | Europe/Switzerland/Vaud                   | 3    | 30 | 30 | 30 | 30 | 30 |
| 180 | Europe/Switzerland/Zug                    | 1    | 29 | 29 | 29 | 29 | 29 |
| 181 | Europe/Switzerland/Zurich                 | 16   | 28 | 30 | 31 | 32 | 38 |
| 182 | Europe/Turkey                             | 1    | 30 | 30 | 30 | 30 | 30 |
| 183 | Europe/United Kingdom/England             | 1700 | 27 | 32 | 33 | 35 | 43 |
| 184 | Europe/United Kingdom/Scotland            | 412  | 27 | 31 | 32 | 34 | 39 |
| 185 | Europe/United Kingdom/Wales               | 9    | 31 | 32 | 33 | 34 | 36 |
| 186 | North America/Canada/Alberta              | 10   | 24 | 29 | 31 | 33 | 33 |
| 187 | North America/Canada/British Columbia     | 5    | 30 | 30 | 31 | 31 | 31 |
| 188 | North America/Canada/Manitoba             | 5    | 30 | 30 | 30 | 30 | 31 |
| 189 | North America/Canada/Ontario              | 29   | 23 | 30 | 31 | 32 | 41 |
| 190 | North America/Canada/Quebec               | 1    | 30 | 30 | 30 | 30 | 30 |
| 191 | North America/Canada/Saskatchewan         | 4    | 29 | 31 | 32 | 32 | 33 |
| 192 | North America/Mexico/Mexico City          | 2    | 31 | 31 | 31 | 31 | 31 |
| 193 | North America/Mexico/State of Mexico      | 1    | 32 | 32 | 32 | 32 | 32 |
| 194 | North America/Puerto Rico                 | 1    | 29 | 29 | 29 | 29 | 29 |
| 195 | North America/USA/Alaska/Anchorage-Mat Su | 1    | 24 | 24 | 24 | 24 | 24 |
| 196 | North America/USA/Arizona/Maricopa County | 5    | 31 | 31 | 31 | 35 | 42 |

|     |                                          |    |    |    |    |    |    |
|-----|------------------------------------------|----|----|----|----|----|----|
| 197 | North America/USA/Arizona/Pima County    | 1  | 33 | 33 | 33 | 33 | 33 |
| 198 | North America/USA/California             | 4  | 30 | 30 | 30 | 30 | 31 |
|     | North America/USA/California/Alameda     |    |    |    |    |    |    |
| 199 | County                                   | 4  | 26 | 29 | 30 | 30 | 30 |
|     | North America/USA/California/Los Angeles |    |    |    |    |    |    |
| 200 | County                                   | 2  | 30 | 31 | 31 | 32 | 32 |
|     | North America/USA/California/San         |    |    |    |    |    |    |
| 201 | Francisco County                         | 1  | 32 | 32 | 32 | 32 | 32 |
|     | North America/USA/California/West        |    |    |    |    |    |    |
| 202 | Sacramento                               | 1  | 31 | 31 | 31 | 31 | 31 |
| 203 | North America/USA/Colorado               | 2  | 26 | 27 | 28 | 29 | 30 |
| 204 | North America/USA/Connecticut            | 3  | 24 | 28 | 31 | 31 | 31 |
| 205 | North America/USA/Connecticut/Fairfield  | 4  | 30 | 30 | 31 | 32 | 32 |
| 206 | North America/USA/Connecticut/Farifield  | 1  | 30 | 30 | 30 | 30 | 30 |
|     | North America/USA/Connecticut/Hartford   |    |    |    |    |    |    |
| 207 | County                                   | 1  | 30 | 30 | 30 | 30 | 30 |
|     | North America/USA/Connecticut/New        |    |    |    |    |    |    |
| 208 | Haven                                    | 2  | 30 | 30 | 31 | 31 | 31 |
| 209 | North America/USA/District of Columbia   | 1  | 23 | 23 | 23 | 23 | 23 |
| 210 | North America/USA/Florida                | 2  | 30 | 30 | 30 | 30 | 30 |
| 211 | North America/USA/Georgia                | 4  | 29 | 29 | 30 | 31 | 32 |
| 212 | North America/USA/Hawaii                 | 2  | 30 | 31 | 31 | 32 | 32 |
|     | North America/USA/Hawaii/Honolulu        |    |    |    |    |    |    |
| 213 | County                                   | 12 | 30 | 30 | 30 | 31 | 32 |
| 214 | North America/USA/Idaho                  | 1  | 30 | 30 | 30 | 30 | 30 |
|     | North America/USA/Illinois/Cook          |    |    |    |    |    |    |
| 215 | County/Chicago                           | 1  | 30 | 30 | 30 | 30 | 30 |
| 216 | North America/USA/Iowa                   | 1  | 31 | 31 | 31 | 31 | 31 |
| 217 | North America/USA/Louisiana              | 2  | 29 | 30 | 31 | 31 | 32 |
|     | North America/USA/Louisiana/Caddo        |    |    |    |    |    |    |
| 218 | Parish                                   | 1  | 31 | 31 | 31 | 31 | 31 |

|     |                                                        |    |    |    |    |    |    |
|-----|--------------------------------------------------------|----|----|----|----|----|----|
| 219 | North America/USA/Louisiana/Orleans                    | 1  | 32 | 32 | 32 | 32 | 32 |
| 220 | North America/USA/Louisiana/St Tammany                 | 2  | 27 | 27 | 27 | 27 | 27 |
| 221 | North America/USA/Maryland                             | 10 | 27 | 30 | 30 | 30 | 31 |
| 222 | North America/USA/Massachusetts                        | 16 | 29 | 30 | 30 | 30 | 32 |
|     | North<br>America/USA/Massachusetts/Middlesex<br>County | 3  | 30 | 30 | 30 | 30 | 30 |
| 223 | North America/USA/Michigan                             | 1  | 31 | 31 | 31 | 31 | 31 |
| 224 | North America/USA/Minnesota                            | 2  | 30 | 30 | 30 | 30 | 30 |
| 225 | North America/USA/Mississippi                          | 1  | 29 | 29 | 29 | 29 | 29 |
| 226 | North America/USA/Missouri                             | 1  | 30 | 30 | 30 | 30 | 30 |
| 227 | North America/USA/Nebraska                             | 6  | 30 | 31 | 31 | 31 | 31 |
| 228 | North America/USA/New Jersey                           | 2  | 29 | 30 | 30 | 31 | 31 |
| 229 | North America/USA/New York                             | 5  | 29 | 30 | 30 | 30 | 31 |
|     | North America/USA/New York/New York<br>City            | 10 | 28 | 29 | 30 | 31 | 31 |
| 231 | North America/USA/New York/Oneida                      | 2  | 23 | 24 | 25 | 26 | 27 |
| 232 | North America/USA/New York/Suffolk                     | 2  | 25 | 26 | 27 | 28 | 29 |
|     | North America/USA/New<br>York/Westchester              | 1  | 31 | 31 | 31 | 31 | 31 |
| 234 | North America/USA/Ohio                                 | 4  | 30 | 30 | 31 | 32 | 32 |
|     | North America/USA/Oregon/Multnomah<br>County           | 1  | 32 | 32 | 32 | 32 | 32 |
| 236 | North America/USA/Oregon/Washington<br>County          | 2  | 30 | 30 | 31 | 31 | 31 |
| 237 | North America/USA/Pennsylvania                         | 2  | 28 | 29 | 30 | 30 | 31 |
| 238 | North America/USA/Rhode Island                         | 1  | 30 | 30 | 30 | 30 | 30 |
| 239 | North America/USA/Tennessee                            | 1  | 23 | 23 | 23 | 23 | 23 |
| 240 | North America/USA/Texas                                | 4  | 31 | 32 | 32 | 32 | 32 |
| 241 | North America/USA/Texas/Ellis                          | 1  | 32 | 32 | 32 | 32 | 32 |
| 242 |                                                        |    |    |    |    |    |    |

|     |                                        |    |    |    |    |    |    |
|-----|----------------------------------------|----|----|----|----|----|----|
| 243 | North America/USA/Texas/Houston        | 6  | 29 | 32 | 34 | 34 | 35 |
| 244 | North America/USA/Texas/Houston County | 25 | 32 | 32 | 33 | 34 | 44 |
|     | North America/USA/Texas/San Antonio    |    |    |    |    |    |    |
| 245 | County                                 | 2  | 34 | 35 | 35 | 36 | 36 |
| 246 | North America/USA/Texas/Tarrant County | 1  | 26 | 26 | 26 | 26 | 26 |
| 247 | North America/USA/Utah                 | 4  | 28 | 30 | 31 | 31 | 31 |
| 248 | North America/USA/Virginia             | 1  | 30 | 30 | 30 | 30 | 30 |
| 249 | North America/USA/Washington           | 7  | 29 | 30 | 30 | 32 | 32 |
|     | North America/USA/Washington/King      |    |    |    |    |    |    |
| 250 | County                                 | 1  | 30 | 30 | 30 | 30 | 30 |
|     | North America/USA/Washington/Whatcom   |    |    |    |    |    |    |
| 251 | County                                 | 1  | 32 | 32 | 32 | 32 | 32 |
| 252 | North America/USA/Wisconsin            | 1  | 32 | 32 | 32 | 32 | 32 |
|     | North America/USA/Wisconsin/Milwaukee  |    |    |    |    |    |    |
| 253 | County                                 | 4  | 24 | 29 | 30 | 31 | 33 |
|     | Oceania/Australia/Australian Capital   |    |    |    |    |    |    |
| 254 | Territory                              | 10 | 29 | 30 | 30 | 30 | 31 |
|     | Oceania/Australia/New South            |    |    |    |    |    |    |
| 255 | Wales/Sydney                           | 79 | 19 | 28 | 30 | 30 | 32 |
| 256 | Oceania/Australia/Northern Territory   | 1  | 29 | 29 | 29 | 29 | 29 |
| 257 | Oceania/Australia/Queensland           | 2  | 33 | 35 | 37 | 38 | 40 |
| 258 | South America/Argentina/San Luis       | 1  | 30 | 30 | 30 | 30 | 30 |
|     | South America/Brazil/Distrito          |    |    |    |    |    |    |
| 259 | Federal/Brasilia                       | 1  | 31 | 31 | 31 | 31 | 31 |
|     | South America/Brazil/Federal           |    |    |    |    |    |    |
| 260 | District/Brasilia                      | 1  | 30 | 30 | 30 | 30 | 30 |
|     | South America/Brazil/Rio Grande do     |    |    |    |    |    |    |
| 261 | Sul/Santa Cruz do Sul                  | 1  | 30 | 30 | 30 | 30 | 30 |

|     |                                          |   |    |    |    |    |    |
|-----|------------------------------------------|---|----|----|----|----|----|
| 262 | South America/Brazil/SÃ£o Paulo          | 1 | 30 | 30 | 30 | 30 | 30 |
| 263 | South America/Brazil/Sao Paulo           | 2 | 29 | 29 | 29 | 29 | 29 |
| 264 | South America/Brazil/Sao Paulo/Guarulhos | 1 | 30 | 30 | 30 | 30 | 30 |
| 265 | South America/Brazil/Sao Paulo/Limeira   | 1 | 30 | 30 | 30 | 30 | 30 |

---

Table S2

| <b>Continent</b> | <b>O1</b> | <b>O2</b> | <b>O3</b> | <b>O4</b> | <b>O5</b> | <b>O6</b> | <b>total</b> |
|------------------|-----------|-----------|-----------|-----------|-----------|-----------|--------------|
|                  | 453       | 94        | 142       | 40        | 301       | 6         |              |
| Africa           | (43.73)   | (9.07)    | (13.71)   | (3.86)    | (29.05)   | (0.58)    | 1036         |
|                  | 84        | 17        | 20        | 3         |           |           |              |
| Asia             | (62.22)   | (12.59)   | (14.81)   | (2.22)    | 11 (8.15) |           | 135          |
|                  | 279       | 173       | 2210      | 8         | 101       | 2         |              |
| Europe           | (10.06)   | (6.24)    | (79.7)    | (0.29)    | (3.64)    | (0.07)    | 2773         |
| North            |           | 60        | 95        |           | 29        | 5         |              |
| America          | 61 (24.3) | (23.9)    | (37.85)   | 1 (0.4)   | (11.55)   | (1.99)    | 251          |
|                  |           | 10        | 1         | 70        | 1         |           |              |
| Oceania          | 5 (5.43)  | 5 (5.43)  | (10.87)   | (1.09)    | (76.09)   | (1.09)    | 92           |
| South            |           | 1         |           |           |           |           |              |
| America          | 6 (66.67) | (11.11)   | 1 (11.11) |           | 1 (11.11) |           | 9            |

Table S3

| Emerging Polymutant<br>Amino acids | R346      |             | A701        |           | I1081       |          | N1192       |           |
|------------------------------------|-----------|-------------|-------------|-----------|-------------|----------|-------------|-----------|
|                                    | K         | R           | A           | V         | I           | V        | N           | S         |
| Total N                            | 347       | 3949        | 3595        | 696       | 4132        | 164      | 4292        | 4         |
| Africa/Botswana                    | 1 (0.29)  | 78 (1.98)   | 79 (2.2)    |           | 79 (1.91)   |          | 79 (1.84)   |           |
| Africa/Ghana                       | 10 (2.88) | 23 (0.58)   | 33 (0.92)   |           | 33 (0.8)    |          | 33 (0.77)   |           |
| Africa/Malawi                      |           | 3 (0.08)    | 3 (0.08)    |           | 3 (0.07)    |          | 3 (0.07)    |           |
| Africa/Nigeria                     | 3 (0.86)  | 8 (0.2)     | 11 (0.31)   |           | 11 (0.27)   |          | 11 (0.26)   |           |
| Africa/Reunion                     | 1 (0.29)  | 1 (0.03)    | 2 (0.06)    |           | 2 (0.05)    |          | 2 (0.05)    |           |
| Africa/Senegal                     |           | 7 (0.18)    | 7 (0.19)    |           | 4 (0.1)     | 3 (1.83) | 7 (0.16)    |           |
| Africa/Sierra Leone                | 1 (0.29)  |             | 1 (0.03)    |           | 1 (0.02)    |          | 1 (0.02)    |           |
| Africa/South Africa                | 31 (8.93) | 869 (22.01) | 848 (23.59) | 52 (7.47) | 900 (21.78) |          | 900 (20.97) |           |
| Asia/Bangladesh                    |           | 2 (0.05)    | 2 (0.06)    |           | 2 (0.05)    |          | 2 (0.05)    |           |
| Asia/Hong Kong                     | 6 (1.73)  | 12 (0.3)    | 16 (0.45)   | 2 (0.29)  | 18 (0.44)   |          | 16 (0.37)   | 2<br>(50) |
| Asia/India                         | 1 (0.29)  | 6 (0.15)    | 7 (0.19)    |           | 7 (0.17)    |          | 7 (0.16)    |           |
| Asia/Israel                        | 4 (1.15)  | 63 (1.6)    | 65 (1.81)   | 2 (0.29)  | 67 (1.62)   |          | 66 (1.54)   | 1<br>(25) |
| Asia/Japan                         | 2 (0.58)  | 5 (0.13)    | 7 (0.19)    |           | 7 (0.17)    |          | 7 (0.16)    |           |
| Asia/Jordan                        |           | 2 (0.05)    | 2 (0.06)    |           | 2 (0.05)    |          | 2 (0.05)    |           |
| Asia/Malaysia                      |           | 1 (0.03)    | 1 (0.03)    |           | 1 (0.02)    |          | 1 (0.02)    |           |
| Asia/Maldives                      |           | 1 (0.03)    | 1 (0.03)    |           | 1 (0.02)    |          | 1 (0.02)    |           |
| Asia/Nepal                         |           | 2 (0.05)    | 2 (0.06)    |           | 2 (0.05)    |          | 2 (0.05)    |           |
| Asia/Pakistan                      |           | 1 (0.03)    | 1 (0.03)    |           | 1 (0.02)    |          | 1 (0.02)    |           |
| Asia/Singapore                     | 1 (0.29)  | 12 (0.3)    | 13 (0.36)   |           | 11 (0.27)   | 2 (1.22) | 13 (0.3)    |           |
| Asia/South Korea                   |           | 9 (0.23)    | 9 (0.25)    |           | 9 (0.22)    |          | 9 (0.21)    |           |
| Asia/Sri Lanka                     |           | 2 (0.05)    | 2 (0.06)    |           | 2 (0.05)    |          | 2 (0.05)    |           |
| Asia/Thailand                      |           | 3 (0.08)    | 3 (0.08)    |           | 3 (0.07)    |          | 3 (0.07)    |           |
| Europe/Austria                     | 2 (0.58)  | 15 (0.38)   | 15 (0.42)   | 2 (0.29)  | 17 (0.41)   |          | 17 (0.4)    |           |
| Europe/Belgium                     | 4 (1.15)  | 71 (1.8)    | 75 (2.09)   |           | 75 (1.82)   |          | 75 (1.75)   |           |
| Europe/Croatia                     |           | 2 (0.05)    | 2 (0.06)    |           | 2 (0.05)    |          | 2 (0.05)    |           |

|                           |             |              |              |             |              |             |              |        |
|---------------------------|-------------|--------------|--------------|-------------|--------------|-------------|--------------|--------|
| Europe/Czech Republic     |             | 5 (0.13)     | 3 (0.08)     | 2 (0.29)    | 5 (0.12)     |             | 5 (0.12)     |        |
| Europe/Denmark            | 2 (0.58)    | 144 (3.65)   | 103 (2.87)   | 43 (6.18)   | 146 (3.53)   |             | 146 (3.4)    |        |
| Europe/Finland            |             | 3 (0.08)     | 3 (0.08)     |             | 3 (0.07)     |             | 3 (0.07)     |        |
| Europe/France             | 4 (1.15)    | 32 (0.81)    | 34 (0.95)    | 2 (0.29)    | 36 (0.87)    |             | 36 (0.84)    |        |
| Europe/Germany            | 3 (0.86)    | 98 (2.48)    | 93 (2.59)    | 8 (1.15)    | 101 (2.44)   |             | 101 (2.35)   |        |
| Europe/Gibraltar          |             | 6 (0.15)     | 6 (0.17)     |             | 6 (0.15)     |             | 6 (0.14)     |        |
| Europe/Greece             |             | 1 (0.03)     | 1 (0.03)     |             | 1 (0.02)     |             | 1 (0.02)     |        |
| Europe/Ireland            |             | 6 (0.15)     | 5 (0.14)     | 1 (0.14)    | 6 (0.15)     |             | 6 (0.14)     |        |
| Europe/Italy              |             | 11 (0.28)    | 10 (0.28)    | 1 (0.14)    | 11 (0.27)    |             | 11 (0.26)    |        |
| Europe/Liechtenstein      |             | 1 (0.03)     | 1 (0.03)     |             | 1 (0.02)     |             | 1 (0.02)     |        |
| Europe/Netherlands        | 6 (1.73)    | 57 (1.44)    | 59 (1.64)    | 4 (0.57)    | 63 (1.52)    |             | 63 (1.47)    |        |
| Europe/Norway             | 2 (0.58)    | 30 (0.76)    | 32 (0.89)    |             | 32 (0.77)    |             | 32 (0.75)    |        |
| Europe/Portugal           |             | 23 (0.58)    | 23 (0.64)    |             | 23 (0.56)    |             | 23 (0.54)    |        |
| Europe/Romania            |             | 2 (0.05)     | 2 (0.06)     |             | 2 (0.05)     |             | 2 (0.05)     |        |
| Europe/Russia             |             | 2 (0.05)     | 2 (0.06)     |             | 2 (0.05)     |             | 2 (0.05)     |        |
| Europe/Slovakia           |             | 3 (0.08)     | 3 (0.08)     |             | 3 (0.07)     |             | 3 (0.07)     |        |
| Europe/Spain              | 5 (1.44)    | 46 (1.16)    | 50 (1.39)    | 1 (0.14)    | 51 (1.23)    |             | 51 (1.19)    |        |
| Europe/Sweden             |             | 16 (0.41)    | 16 (0.45)    |             | 16 (0.39)    |             | 16 (0.37)    |        |
| Europe/Switzerland        | 4 (1.15)    | 45 (1.14)    | 49 (1.36)    |             | 49 (1.19)    |             | 49 (1.14)    |        |
| Europe/Turkey             |             | 1 (0.03)     | 1 (0.03)     |             | 1 (0.02)     |             | 1 (0.02)     |        |
| Europe/United Kingdom*    | 153 (44.09) | 1968 (49.84) | 1558 (43.34) | 558 (80.17) | 1962 (47.48) | 159 (96.95) | 2120 (49.39) | 1 (25) |
| North America/Canada      | 17 (4.9)    | 37 (0.94)    | 54 (1.5)     |             | 54 (1.31)    |             | 54 (1.26)    |        |
| North America/Mexico      |             | 3 (0.08)     | 3 (0.08)     |             | 3 (0.07)     |             | 3 (0.07)     |        |
| North America/Puerto Rico |             | 1 (0.03)     | 1 (0.03)     |             | 1 (0.02)     |             | 1 (0.02)     |        |
| North America/USA         | 36 (10.37)  | 157 (3.98)   | 176 (4.9)    | 17 (2.44)   | 193 (4.67)   |             | 193 (4.5)    |        |
| Oceania/Australia         | 48 (13.83)  | 44 (1.11)    | 92 (2.56)    |             | 92 (2.23)    |             | 92 (2.14)    |        |
| South America/Argentina   |             | 1 (0.03)     |              | 1 (0.14)    | 1 (0.02)     |             | 1 (0.02)     |        |
| South America/Brazil      |             | 8 (0.2)      | 8 (0.22)     |             | 8 (0.19)     |             | 8 (0.19)     |        |

---



\* there are five missing nucleotide observations

Table S4

| Country             | nsp3-V1069     |                | nsp4-V94 |                | RNA poly.-Y460 |                | RNA poly.-L694 |                | ORF3a-L106 |                | N-D343     |          |
|---------------------|----------------|----------------|----------|----------------|----------------|----------------|----------------|----------------|------------|----------------|------------|----------|
|                     | I              | V              | A        | V              | C              | Y              | I              | L              | F          | L              | D          | G        |
| Freq                | 1085           | 3206           | 1005     | 3290           | 3              | 4293           | 1685           | 2611           | 444        | 3852           | 3854       | 442      |
| Africa/Botswana     | 8 (0.74)       | 71 (2.21)      |          | 79 (2.4)       |                | 79 (1.84)      |                | 79 (3.03)      |            | 79 (2.05)      | 79 (2.05)  |          |
| Africa/Ghana        | 3 (0.28)       | 30 (0.94)      |          | 33 (1)         |                | 33 (0.77)      |                | 33 (1.26)      | 5 (1.13)   | 28 (0.73)      | 28 (0.73)  | 5 (1.13) |
| Africa/Malawi       |                | 3 (0.09)       |          | 3 (0.09)       |                | 3 (0.07)       |                | 3 (0.11)       |            | 3 (0.08)       | 3 (0.08)   |          |
| Africa/Nigeria      |                | 11 (0.34)      |          | 11 (0.33)      |                | 11 (0.26)      |                | 11 (0.42)      | 1 (0.23)   | 10 (0.26)      | 10 (0.26)  | 1 (0.23) |
| Africa/Reunion      |                | 2 (0.06)       |          | 2 (0.06)       |                | 2 (0.05)       |                | 2 (0.08)       |            | 2 (0.05)       | 2 (0.05)   |          |
| Africa/Senegal      |                | 7 (0.22)       |          | 7 (0.21)       |                | 7 (0.16)       |                | 7 (0.27)       | 3 (0.68)   | 4 (0.1)        | 4 (0.1)    | 3 (0.68) |
| Africa/Sierra Leone |                | 1 (0.03)       |          | 1 (0.03)       |                | 1 (0.02)       |                | 1 (0.04)       |            | 1 (0.03)       | 1 (0.03)   |          |
| Africa/South Africa | 190<br>(17.51) | 710<br>(22.15) |          | 900<br>(27.36) |                | 900<br>(20.96) |                | 900<br>(34.47) | 2 (0.45)   | 898<br>(23.31) | 898 (23.3) | 2 (0.45) |
| Asia/Bangladesh     |                | 2 (0.06)       |          | 2 (0.06)       |                | 2 (0.05)       |                | 2 (0.08)       |            | 2 (0.05)       | 2 (0.05)   |          |
| Asia/Hong Kong      | 2 (0.18)       | 16 (0.5)       |          | 18 (0.55)      |                | 18 (0.42)      |                | 18 (0.69)      |            | 18 (0.47)      | 18 (0.47)  |          |
| Asia/India          | 1 (0.09)       | 6 (0.19)       |          | 7 (0.21)       |                | 7 (0.16)       |                | 7 (0.27)       |            | 7 (0.18)       | 7 (0.18)   |          |
| Asia/Israel         | 8 (0.74)       | 59 (1.84)      |          | 67 (2.04)      |                | 67 (1.56)      |                | 67 (2.57)      | 6 (1.35)   | 61 (1.58)      | 63 (1.63)  | 4 (0.9)  |
| Asia/Japan          |                | 7 (0.22)       |          | 7 (0.21)       |                | 7 (0.16)       |                | 7 (0.27)       |            | 7 (0.18)       | 7 (0.18)   |          |
| Asia/Jordan         |                | 2 (0.06)       |          | 2 (0.06)       |                | 2 (0.05)       |                | 2 (0.08)       |            | 2 (0.05)       | 2 (0.05)   |          |
| Asia/Malaysia       |                | 1 (0.03)       |          | 1 (0.03)       |                | 1 (0.02)       |                | 1 (0.04)       |            | 1 (0.03)       | 1 (0.03)   |          |
| Asia/Maldives       |                | 1 (0.03)       |          | 1 (0.03)       |                | 1 (0.02)       |                | 1 (0.04)       |            | 1 (0.03)       | 1 (0.03)   |          |
| Asia/Nepal          |                | 2 (0.06)       |          | 2 (0.06)       |                | 2 (0.05)       |                | 2 (0.08)       |            | 2 (0.05)       | 2 (0.05)   |          |
| Asia/Pakistan       |                | 1 (0.03)       |          | 1 (0.03)       |                | 1 (0.02)       |                | 1 (0.04)       |            | 1 (0.03)       | 1 (0.03)   |          |
| Asia/Singapore      |                | 13 (0.41)      |          | 13 (0.4)       |                | 13 (0.3)       |                | 13 (0.5)       | 2 (0.45)   | 11 (0.29)      | 11 (0.29)  | 2 (0.45) |
| Asia/South Korea    |                | 9 (0.28)       |          | 9 (0.27)       |                | 9 (0.21)       |                | 9 (0.34)       |            | 9 (0.23)       | 9 (0.23)   |          |
| Asia/Sri Lanka      |                | 2 (0.06)       |          | 2 (0.06)       |                | 2 (0.05)       |                | 2 (0.08)       | 2 (0.45)   |                |            | 2 (0.45) |
| Asia/Thailand       | 1 (0.09)       | 2 (0.06)       |          | 3 (0.09)       |                | 3 (0.07)       |                | 3 (0.11)       | 1 (0.23)   | 2 (0.05)       | 2 (0.05)   | 1 (0.23) |
| Europe/Austria      | 9 (0.83)       | 8 (0.25)       |          | 17 (0.52)      |                | 17 (0.4)       |                | 17 (0.65)      |            | 17 (0.44)      | 17 (0.44)  |          |

|                        |             |              |            |              |              |              |             |             |              |              |             |
|------------------------|-------------|--------------|------------|--------------|--------------|--------------|-------------|-------------|--------------|--------------|-------------|
| Europe/Belgium         | 2 (0.18)    | 73 (2.28)    | 75 (2.28)  | 75 (1.75)    | 75 (2.87)    | 75 (1.95)    | 75 (1.95)   |             |              |              |             |
| Europe/Croatia         | 2 (0.18)    |              | 2 (0.06)   | 2 (0.05)     | 2 (0.08)     | 2 (0.05)     | 2 (0.05)    |             |              |              |             |
| Europe/Czech Republic  | 2 (0.18)    | 3 (0.09)     | 5 (0.15)   | 5 (0.12)     | 5 (0.19)     | 5 (0.13)     | 5 (0.13)    |             |              |              |             |
|                        |             |              |            |              | 146          |              |             |             |              |              |             |
| Europe/Denmark         | 78 (7.19)   | 68 (2.12)    | 146 (4.44) | 146 (3.4)    | (5.59)       | 3 (0.68)     | 143 (3.71)  | 143 (3.71)  | 3 (0.68)     |              |             |
| Europe/Finland         | 1 (0.09)    | 2 (0.06)     | 3 (0.09)   | 3 (0.07)     | 3 (0.11)     | 3 (0.08)     | 3 (0.08)    | 3 (0.08)    |              |              |             |
| Europe/France          | 19 (1.75)   | 17 (0.53)    | 36 (1.09)  | 36 (0.84)    | 3 (0.18)     | 33 (1.26)    | 36 (0.93)   | 36 (0.93)   |              |              |             |
|                        |             |              |            |              | 101          |              |             |             |              |              |             |
| Europe/Germany         | 27 (2.49)   | 74 (2.31)    | 101 (3.07) | 101 (2.35)   | (3.87)       | 7 (1.58)     | 94 (2.44)   | 94 (2.44)   | 7 (1.58)     |              |             |
| Europe/Gibraltar       |             | 6 (0.19)     | 6 (0.18)   | 6 (0.14)     | 6 (0.23)     | 5 (1.13)     | 1 (0.03)    | 1 (0.03)    | 5 (1.13)     |              |             |
| Europe/Greece          |             | 1 (0.03)     | 1 (0.03)   | 1 (0.02)     | 1 (0.04)     |              | 1 (0.03)    | 1 (0.03)    |              |              |             |
| Europe/Ireland         | 1 (0.09)    | 5 (0.16)     | 6 (0.18)   | 6 (0.14)     | 6 (0.23)     | 1 (0.23)     | 5 (0.13)    | 5 (0.13)    | 1 (0.23)     |              |             |
| Europe/Italy           | 1 (0.09)    | 10 (0.31)    | 11 (0.33)  | 11 (0.26)    | 11 (0.42)    |              | 11 (0.29)   | 11 (0.29)   |              |              |             |
|                        |             |              |            |              |              |              |             |             |              |              |             |
| Europe/Liechtenstein   |             | 1 (0.03)     | 1 (0.03)   | 1 (0.02)     | 1 (0.04)     |              | 1 (0.03)    | 1 (0.03)    |              |              |             |
|                        |             |              |            |              |              |              |             |             |              |              |             |
| Europe/Netherlands     | 7 (0.65)    | 56 (1.75)    | 63 (1.91)  | 63 (1.47)    | 63 (2.41)    | 4 (0.9)      | 59 (1.53)   | 59 (1.53)   | 4 (0.9)      |              |             |
| Europe/Norway          |             | 32 (1)       | 32 (0.97)  | 32 (0.75)    | 32 (1.23)    |              | 32 (0.83)   | 32 (0.83)   |              |              |             |
| Europe/Portugal        |             | 23 (0.72)    | 23 (0.7)   | 23 (0.54)    | 23 (0.88)    |              | 23 (0.6)    | 23 (0.6)    |              |              |             |
| Europe/Romania         | 1 (0.09)    | 1 (0.03)     | 2 (0.06)   | 2 (0.05)     | 2 (0.08)     |              | 2 (0.05)    | 2 (0.05)    |              |              |             |
| Europe/Russia          |             | 2 (0.06)     | 2 (0.06)   | 2 (0.05)     | 2 (0.08)     |              | 2 (0.05)    | 2 (0.05)    |              |              |             |
| Europe/Slovakia        |             | 3 (0.09)     | 3 (0.09)   | 3 (0.07)     | 3 (0.11)     |              | 3 (0.08)    | 3 (0.08)    |              |              |             |
| Europe/Spain           | 34 (3.13)   | 17 (0.53)    | 51 (1.55)  | 51 (1.19)    | 51 (1.95)    |              | 51 (1.32)   | 51 (1.32)   |              |              |             |
| Europe/Sweden          | 1 (0.09)    | 15 (0.47)    | 16 (0.49)  | 16 (0.37)    | 16 (0.61)    | 7 (1.58)     | 9 (0.23)    | 9 (0.23)    | 7 (1.58)     |              |             |
|                        |             |              |            |              |              |              |             |             |              |              |             |
| Europe/Switzerland     | 4 (0.37)    | 45 (1.4)     | 49 (1.49)  | 49 (1.14)    | 49 (1.88)    |              | 49 (1.27)   | 49 (1.27)   |              |              |             |
| Europe/Turkey          |             | 1 (0.03)     | 1 (0.03)   | 1 (0.02)     | 1 (0.04)     |              | 1 (0.03)    | 1 (0.03)    |              |              |             |
| Europe/United Kingdom* | 623 (57.42) | 1493 (46.57) | 1005 (100) | 1115 (33.89) | 2121 (49.41) | 1681 (99.76) | 440 (16.85) | 335 (75.45) | 1786 (46.37) | 1786 (46.34) | 335 (75.79) |

|                           |           |            |            |           |           |            |            |            |            |            |
|---------------------------|-----------|------------|------------|-----------|-----------|------------|------------|------------|------------|------------|
| North America/Canada      | 2 (0.18)  | 52 (1.62)  | 54 (1.64)  | 54 (1.26) | 54 (2.07) | 9 (2.03)   | 45 (1.17)  | 44 (1.14)  | 10 (2.26)  |            |
| North America/Mexico      |           | 3 (0.09)   | 3 (0.09)   | 3 (0.07)  | 3 (0.11)  |            | 3 (0.08)   | 3 (0.08)   |            |            |
| North America/Puerto Rico |           | 1 (0.03)   | 1 (0.03)   | 1 (0.02)  | 1 (0.04)  |            | 1 (0.03)   | 1 (0.03)   |            |            |
| North America/USA         | 32 (2.95) | 161 (5.02) | 193 (5.87) | 193 (4.5) | 1 (0.06)  | 192 (7.35) | 50 (11.26) | 143 (3.71) | 144 (3.74) | 49 (11.09) |
| Oceania/Australia         | 23 (2.12) | 69 (2.15)  | 92 (2.8)   | 3 (100)   | 89 (2.07) | 92 (3.52)  | 1 (0.23)   | 91 (2.36)  | 91 (2.36)  | 1 (0.23)   |
| South America/Argentina   | 1 (0.09)  |            | 1 (0.03)   | 1 (0.02)  | 1 (0.04)  |            | 1 (0.03)   | 1 (0.03)   |            |            |
| South America/Brazil      | 2 (0.18)  | 6 (0.19)   | 8 (0.24)   | 8 (0.19)  | 8 (0.31)  |            | 8 (0.21)   | 8 (0.21)   |            |            |
| South America/Brazil      |           | 8 (0.2)    |            |           |           |            |            |            |            |            |

\* missing nucleotides





|                                                         |   |   |   |   |   |   |   |   |    |   |    |   |    |   |   |    |    |   |     |  |    |
|---------------------------------------------------------|---|---|---|---|---|---|---|---|----|---|----|---|----|---|---|----|----|---|-----|--|----|
| North America / USA / California / San Francisco County | 1 |   |   |   |   |   |   |   |    |   |    |   |    |   |   |    |    |   |     |  | 1  |
| North America / USA / Connecticut / Fairfield           |   |   |   |   |   |   |   |   |    |   |    |   |    |   | 1 |    |    |   |     |  | 1  |
| North America / USA / Georgia                           |   |   |   |   |   |   |   |   |    |   |    |   |    |   |   |    |    |   |     |  | 1  |
| North America / USA / Hawaii                            |   |   |   |   |   |   |   |   |    |   |    |   |    |   |   |    |    |   |     |  | 1  |
| North America / USA / Hawaii / Honolulu County          |   |   |   |   |   |   |   |   |    |   |    |   |    |   |   |    |    |   |     |  | 2  |
| North America / USA / Louisiana                         |   |   |   |   |   |   |   |   |    |   |    |   |    |   |   |    |    |   |     |  | 1  |
| North America / USA / Louisiana / Caddo Parish          |   |   |   |   |   |   |   |   |    |   |    |   |    |   |   |    |    |   |     |  | 1  |
| North America / USA / Louisiana / Orleans               |   |   |   |   |   |   |   |   |    |   |    |   |    |   |   |    |    |   |     |  | 1  |
| North America / USA / Louisiana / St Tammany            |   |   |   |   |   |   |   |   |    |   |    |   |    |   |   |    |    |   |     |  | 2  |
| North America / USA / Massachusetts                     |   |   |   |   |   |   |   |   |    |   |    |   |    |   |   |    |    |   |     |  | 1  |
| North America / USA / Ohio                              |   |   |   |   |   |   |   |   |    |   |    |   |    |   |   |    |    |   |     |  | 1  |
| North America / USA / Texas                             |   |   |   |   |   |   |   |   |    |   |    |   |    |   |   |    |    |   |     |  | 3  |
| North America / USA / Texas / Houston                   |   |   |   |   |   |   |   |   |    |   |    |   |    |   |   |    |    |   |     |  | 5  |
| North America / USA / Texas / Houston County            |   |   |   |   |   |   |   |   |    |   |    |   |    |   |   |    |    |   |     |  | 21 |
| North America / USA / Texas / San Antonio County        | 1 |   |   |   |   |   |   |   |    |   |    |   |    |   |   |    |    |   |     |  | 2  |
| North America / USA / Washington                        |   |   |   |   |   |   |   |   |    |   |    |   |    |   |   |    |    |   |     |  | 2  |
| North America / USA / Washington / Whatcom County       |   |   |   |   |   |   |   |   |    |   |    |   |    |   |   |    |    |   |     |  | 1  |
| North America / USA / Wisconsin / Milwaukee County      |   |   |   |   |   |   |   |   |    |   |    |   |    |   |   |    |    |   |     |  | 1  |
| Oceania / Australia / Queensland                        |   |   |   |   |   |   |   |   |    |   |    |   |    |   |   |    |    |   |     |  | 1  |
| <b>total</b>                                            |   | 1 | 1 | 5 | 5 | 5 | 1 | 4 | 10 | 7 | 12 | 7 | 15 | 9 | 8 | 28 | 24 | 2 | 144 |  |    |

Table S7

---

|            | England | Scotland | Wales |
|------------|---------|----------|-------|
| 2021-12-01 |         | 4        |       |
| 2021-12-02 |         | 5        |       |
| 2021-12-03 |         | 4        |       |
| 2021-12-04 |         | 13       |       |
| 2021-12-05 |         | 7        |       |
| 2021-12-06 | 17      | 1        |       |
| 2021-12-07 | 8       |          | 1     |

---
